# Supplementary material
Source: publisher figshare collection journal article supplement (https://tandf.figshare.com/ndownloader/files/24397703)
Supplement: Supplementary file 1 [file 24397703]

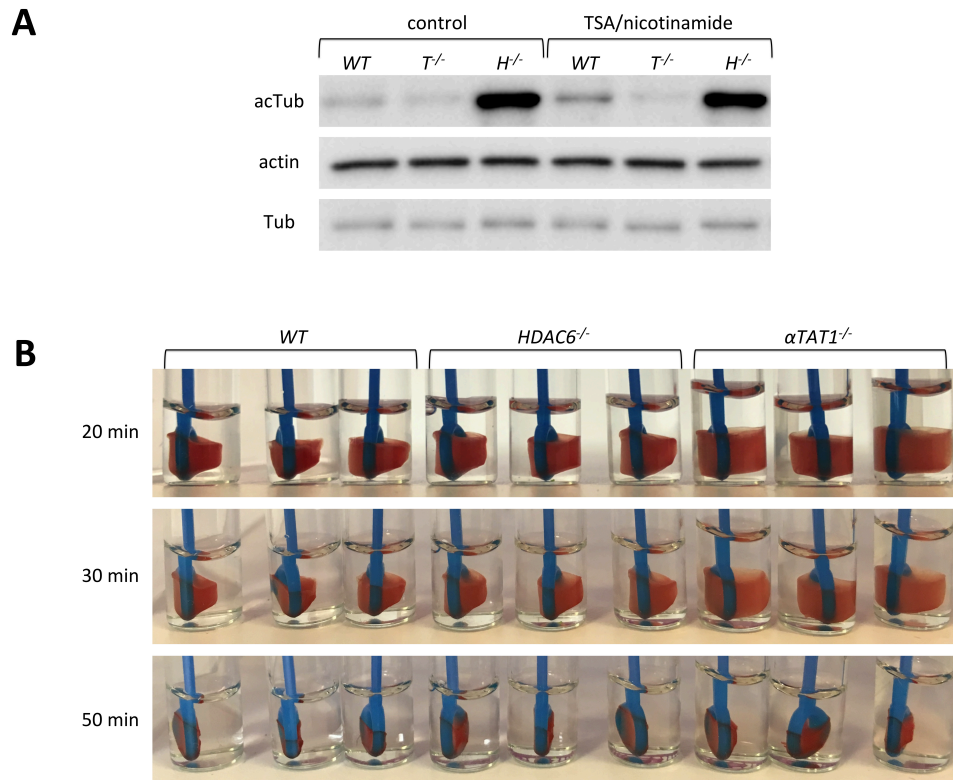

supplementary Figure 1

**supplementary Figure 1:**

**A)** Platelets of *WT*,  $\alpha TAT1^{-/-}$  ( $T^{-/-}$ ) and *HDAC6* $^{-/-}$  ( $H^{-/-}$ ) mice were treated or not with TSA (0.1  $\mu\text{g/mL}$ ) and nicotinamide (5 mM) for 20 min. Tubulin acetylation levels in platelet lysates were determined by Western blot using an antibody against acetylated  $\alpha$ -tubulin and antibodies against tubulin as well as actin as loading controls ( $2 \times 10^6$  platelets/lane).

**B)** Thrombin (final concentration 0.5 U/mL) was added to a glass tube containing 200  $\mu\text{L}$  PRP to induce clot formation. After 20 min clots are transferred into new glass tubes containing 200  $\mu\text{L}$  PBS and contraction was allowed to continue for 50 min. The extruded serum volume after 20 min of contraction was measured to quantify clot retraction (see figure 1D).

**A**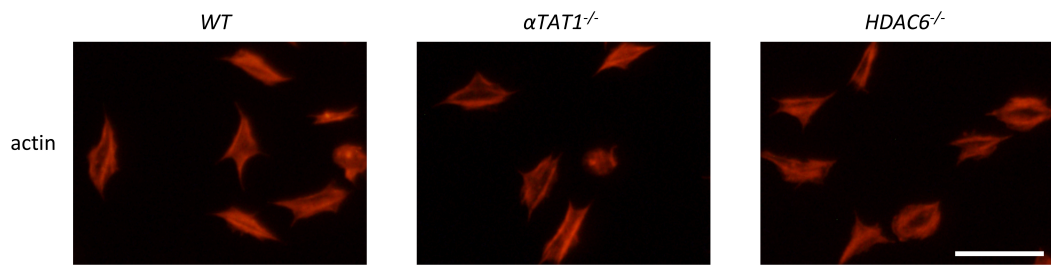**B**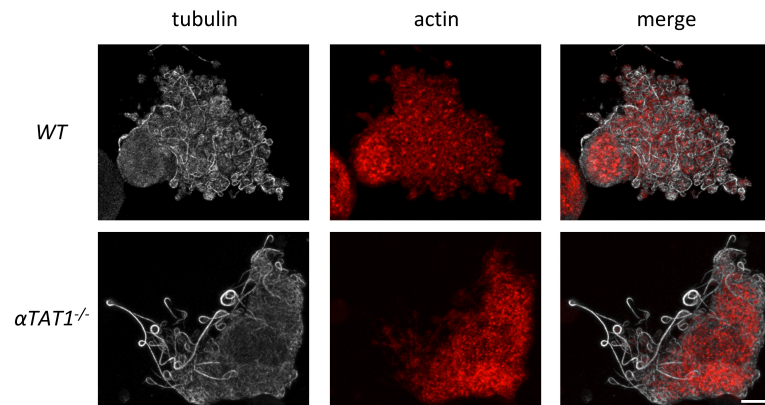

supplementary Figure 2

**supplementary Figure 2:**

**A)** The actin cytoskeleton in platelets of *WT*,  $\alpha TAT1^{-/-}$  and *HDAC6*<sup>-/-</sup> mice after 1h of spreading stained with phalloidin-rhodamine (scale bar, 10  $\mu$ m).

**B)** The actin and tubulin cytoskeleton of megakaryocytes from *WT* and  $\alpha TAT1^{-/-}$  mice differentiated for 4d in culture (scale bar, 10  $\mu$ m).
